# Supplementary material
Source: PubMed Central journal article supplement (PMC4624348)
Supplement: mmc2.pdf [file mmc2.pdf]

## Article

## Temperature Effect on Ionic Current and ssDNA Transport through Nanopores

Linda Payet,<sup>1</sup> Marlène Martinho,<sup>1</sup> Céline Merstorf,<sup>1</sup> Manuela Pastoriza-Gallego,<sup>2</sup> Juan Pelta,<sup>1</sup> Virgile Viasnoff,<sup>3,4</sup> Loïc Auvray,<sup>5</sup> Murugappan Muthukumar,<sup>6</sup> and Jérôme Mathé<sup>1,\*</sup>

<sup>1</sup>LAMBE, équipe MPI, CNRS-UMR 8587, Université d'Évry, Évry, France; <sup>2</sup>LAMBE, équipe MPI, CNRS-UMR 8587, Université de Cergy-Pontoise, Cergy-Pontoise, France; <sup>3</sup>Laboratoire Gulliver équipe NBP, CNRS-UMR 7083, ESPCI, Paris, France; <sup>4</sup>CNRS UMI 3639, MechanoBiology Institute at National University of Singapore, Singapore, Singapore; <sup>5</sup>Laboratoire MSC, CNRS-UMR 7057, Université Denis Diderot, Paris, France; and <sup>6</sup>Department of Polymer Science and Engineering, University of Massachusetts, Amherst, Massachusetts

**ABSTRACT** We have investigated the role of electrostatic interactions in the transport of nucleic acids and ions through nanopores. The passage of DNA through nanopores has so far been conjectured to involve a free-energy barrier for entry, followed by a downhill translocation where the driving voltage accelerates the polymer. We have tested the validity of this conjecture by using two toxins,  $\alpha$ -hemolysin and aerolysin, which differ in their shape, size, and charge. The characteristic timescales in each toxin as a function of temperature show that the entry barrier is  $\sim 15k_B T$  and the translocation barrier is  $\sim 35k_B T$ , although the electrical force in the latter step is much stronger. Resolution of this fact, using a theoretical model, reveals that the attraction between DNA and the charges inside the barrel of the pore is the most dominant factor in determining the translocation speed and not merely the driving electrochemical potential gradient.

### INTRODUCTION

The dynamics of biological polymers going through narrow channels is crucial in many biological processes: RNA export through the nuclear pore complex, phage DNA ejection, and protein translocation through membranes. It is, as well, an important phenomenon to control in most of the DNA sequencing methods using nanopores. Polymer translocation experiments, theoretical models, and simulations, have been performed to study the translocation dynamics dependence on polymer type (1–6), polymer length (7), voltage applied (6,8), temperature (8,9), ionic strength (10,11), and nanopore nature (12,13). Voltage dependence associated with barrier-crossing formalism allowed some authors to extract an entry barrier height (5,8,11,14,15). Some other publications modeled the energy landscape of translocation (16,17) to get insight into the dynamics. Even though the temperature effect on transport dynamics has been already addressed, no interpretation of the thermodynamics of the process has been extracted except in the simulations of Matysiak (18) and, recently, a study by Mahendran and colleagues on the transport of polypeptides (19). The effect of the electrostatic interaction between the translocating chain and the pore wall charges have been studied by others (12,20,21) by tuning either the pore wall charges or the polymer charge. All underline the importance of electrostatic interactions in the transport.

The forces between the protein pore and DNA under nonequilibrium conditions are very complicated. As a result, the experimental data reported in the literature so far are only phenomenological. From the theoretical perspective, only simple models have been presented, without any quantitative comparison with experimental data or any validation of assumptions used in the models. Basically, there have been two models: 1) a particle-virtual-pore model, and 2) a polymer threading model (22). The major focus of theoretical predictions has been on the voltage dependence or DNA-length dependence of the average translation time. Although there have been several molecular dynamics simulations to explore the DNA motion inside a protein pore, the long time regime relevant to DNA translocation through protein pores remains to be explored. On the other hand, theoretical models are more suited to interpret experimental data due to their capacity to address longer time regimes relevant to experiments. However, there currently exists a critical need to interpret carefully acquired experimental data on different systems with any theoretical model. Furthermore, although free-energy barriers are invoked in theoretical models, the magnitude of these barriers remains to be established. An approach combining experiments and theory will enable a deeper understanding of the nature of various forces and barriers dictating the translocation kinetics of DNA through protein pores. That is the primary purpose of this article.

Toward achieving this goal, we have investigated two pores,  $\alpha$ -hemolysin ( $\alpha$ HL) and aerolysin (AL), and monitored the ionic current and DNA transport through them.

Submitted June 23, 2015, and accepted for publication August 25, 2015.

\*Correspondence: jerome.mathe@univ-evry.fr

Editor: Hagan Bayley.

© 2015 by the Biophysical Society  
0006-3495/15/10/1600/8

<http://dx.doi.org/10.1016/j.bpj.2015.08.043>

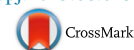

Since the nature of the free-energy barriers for these transport processes is our focus, we have measured the effect of temperature on the ionic current and DNA translocation for both pores. Regarding an explanation of the observed ionic current through the pores, we used the one-dimensional (1D) Poisson-Nernst-Planck equation. In interpreting the DNA data, we theoretically modeled the free-energy landscape for threading by including a mean electrostatic interaction energy averaged over the whole length of the protein pore.

The main observations for the open-pore current are 1) rectification in the ionic current, and 2) Arrhenius-type temperature dependence. Modeling the rectification requires knowledge of the internal charge decoration of the pores. The inner structure of  $\alpha$ HL is well known (23), but the crystal structure of the aerolysin pore is not yet available, although the group of F. Gisou van der Goot puzzled out a possible amino acid sequence which forms the  $\beta$ -barrel (24). In this article, we verify the adequacy of this sequence from the electrostatic point of view by measuring the open-pore current and its rectification as a function of temperature. The rectification is known to be strongly dependent on the electrostatic potential seen by the flowing ions, i.e., the amino acid sequence (25–28). The two pores used here differ in their shape, size, and charge.  $\alpha$ HL has a mushroom shape with a voluminous extramembrane part (the so-called vestibule) and a transmembrane part with a smaller constriction of  $\sim 1.4$  nm (23). Its overall charge is  $+7e$ . The AL pore has an extramembrane part lying on top of the membrane (no vestibule) and a transmembrane part with a constriction estimated to be between 1 and 1.7 nm (29). Its overall charge is  $-52e$ . When the details of charge distribution are included in the 1D Poisson-Nernst-Planck equation, the experimentally observed rectification can be readily accounted for. The observed Arrhenius-type barrier ( $\sim 5k_B T$ ) for the open-pore current is essentially due to the viscosity of the electrolyte solution.

One of the key results deduced from the temperature dependence of translocation dynamics through  $\alpha$ HL and AL is that the energetics of DNA capture at the pore and the subsequent threading through the pore are distinctively different. Although both the capture and threading obey the Arrhenius-type law, the barrier for capture is about  $15k_B T$ , whereas the barrier for threading is much higher, namely  $\sim 35k_B T$ . This remarkable result is not anticipated, because the rate-limiting step of polymer translocation has so far been assumed to be the capture process, with the threading process as a downhill (in free energy), accelerated expulsion of DNA from the pore.

Toward an understanding of these intriguing experimental results, and to gain physical insight without much numerics, we have implemented the analytically tractable polymer threading model (30) for the experimental situation presented here. In this model, the segments of a flexible polyelectrolyte chain thread through a nanopore in single file

under an electrophoretic force, and there is an attractive interaction between the pore and every polymer segment inside the pore. Calculations based on this model using the Fokker-Planck formalism show that the unexpected large free-energy barrier for the threading stage can be attributed to the amplification of local pore-polymer attraction by the pore length. The comparison between experimental results and the value of the pore-polymer interaction energy used in the theoretical model enables the tunability of the barrier for translocation and hence its speed.

## MATERIALS AND METHODS

The experimental setup is composed of a Teflon cell inside a Faraday cage. The cell is made of two  $\sim 90$   $\mu$ L chambers connected by a U-shape tube ended at one side by a 10 to 20  $\mu$ m hole on which the lipid bilayer is formed. Ag/AgCl electrodes are connected to each chamber to measure the ionic current, and the transmembrane voltage is applied using an Axopatch 200B amplifier (Molecular Devices, Sunnyvale, CA). The signal is first low-pass filtered by a four-pole Bessel filter with a cutoff frequency of 100 kHz (Khron-Hite, Brockton, MA), or 30 kHz in some cases using AL pores when the noise was too high to detect the events on the fly (especially at 60°C). It is then digitized at a sampling frequency of 1 MHz using a 16-bit acquisition card (National Instruments, Austin, TX) and finally saved directly to the hard drive of a computer. The acquisition card is controlled via a homemade program written with LabView (National Instruments).

The Teflon cell, embedded in a copper holder, is thermalized at a temperature varying from 5 to  $70 \pm 0.1^\circ\text{C}$  using a Peltier module connected to a temperature controller (Newport, Irvine, CA). For temperatures of 25–70°C, the evaporation of water is not negligible, inducing an increase of the salt concentration and therefore a variation of the baseline current. We thus add water at a rate of 7  $\mu$ L/h at 25°C to 64  $\mu$ L/h at 70°C. This problem needs to be addressed carefully, because the frequency of entry of the DNA increases exponentially with salt concentration, as demonstrated in Bonthuis et al. (10). In the Supporting Material, we show an evolution of the event frequency as a function of the open-pore current while the water evaporates (see Fig. S6).

Lipids are diphytanoilphosphatidylcholine (Avanti Lipids, Alabaster, AL). The  $\alpha$ HL toxin was purchased from Sigma Aldrich (St. Louis, MO) and dissolved in water at a concentration of 1  $\mu$ g/ $\mu$ L and added directly to the chamber solution to a final concentration of 1–10  $\mu$ g/mL. The AL toxin was synthesized using a procedure described in the literature (6,31) and briefly in the Supporting Material. The final concentration of AL in the chamber is 1–10  $\mu$ g/mL.

Single-stranded DNA (ssDNA) was purchased from Eurogentec (Liege, Belgium). Their sequence is (*dA*<sub>29</sub>*dC*<sub>7</sub>*dA*<sub>14</sub>) and they were used with a final concentration in the *cis* chamber of 0.1–2  $\mu$ M.

## RESULTS AND DISCUSSION

We first present results on the temperature dependence of the open-pore current through  $\alpha$ HL and AL, followed by DNA transport through these pores.

### Current-voltage curve of the open pores

The ionic current characteristics of the pores are measured by their current-voltage (I-V) curves and the asymmetry displayed in these curves. The I-V curves obtained at 15°C for both pores are presented in Fig. 1. The  $\alpha$ HL I-V curve is

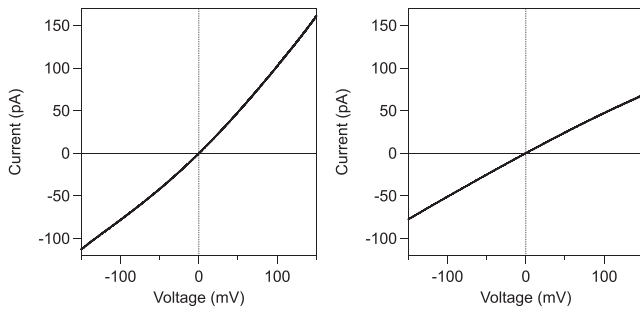

FIGURE 1 I-V curves at 15°C in 1 M KCl of (left)  $\alpha$ HL pore and (right) AL pore. The  $\alpha$ HL pore produces a convex I-V curve with an asymmetry of  $\sim 30\%$  ( $\alpha \approx 1.3$ ). The AL pore produces a concave I-V curve with an asymmetry of  $\sim 10\%$  ( $\alpha \approx 0.9$ ). Asymmetry,  $\alpha$ , is defined in the text.

very similar to those measured in numerous previous studies (for instance, Meller and Branton (8), Bonthuis et al. (10), and Misakian and Kasianowicz (27)). The only I-V curve of the AL pore that could be found in the literature is in the study by Pastoriza-Gallego et al. (6), using an upside-down orientation of the electrodes. The asymmetry observed on an I-V curve is defined from the open-pore currents measured at a voltage  $V = \pm 120$  mV. Thus, it obviously depends on the orientation of the pore with respect to the electrode. Therefore, we followed the procedure detailed in the Supporting Material. We indeed observe that  $>90\%$  of the pore insertions yielded to an I-V curve oriented as in Fig. 1.

This measurement is repeated at different temperatures from 5 to 70°C. We represent in Fig. 2 the pore current as a function of temperature for an applied voltage of +120 mV. We observe a large increase of the current

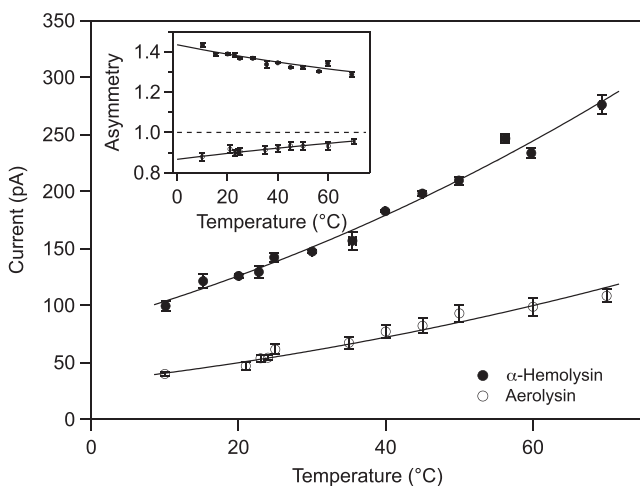

FIGURE 2 Ionic current for 120 mV applied voltage versus temperature for  $\alpha$ HL (solid circles) and AL pores (open circles). The plain curves represent fits to Arrhenius law leading to an energy barrier of  $\sim 5k_B T$ . (Inset) The measured asymmetry factor,  $\alpha$ , at 120 mV for both pores, with symbols defined as in the main figure. The plain curves are the asymmetry calculated following the procedure of Misakian and Kasianowicz (27) using the amino acids positions reported in Table S1.

due to temperature (8,32). The increase closely matches the change in viscosity of the solution as underlined in Meller and Branton (8) for a smaller range of temperature. It is common to associate the change of viscosity to a barrier-crossing process. Fitting the pore current as a function of temperature by an Arrhenius law gives an energy barrier of  $\sim 5k_B T$ , which is very close to the value obtained in Mahandran and Lamichhane (19). This is consistent with the value obtained by considering tabulated measurements of the bulk conductivity (33). Therefore, the main contributor to the current increase with temperature is the bulk behavior itself.

In the inset of Fig. 2 is represented the asymmetry factor of the current, calculated as  $\alpha = |I_+/I_-|$ , where  $I_+$  and  $I_-$  are the current measured at  $V = +120$  mV and  $V = -120$  mV, respectively, as in Bhattacharya et al. (28). Therefore,  $\alpha$  tends to 1 when the curve tends to be symmetrical. In addition,  $\alpha$  is  $>1$  if the I-V curve is convex, as for  $\alpha$ HL (see Fig. 1, left) and  $\alpha$  is  $<1$  if the curve is concave as for AL (see Fig. 1, right). This definition eliminates the contribution of solvent conductivity to ionic-current variations.

The asymmetry observed depends on the interaction potential seen by the ions along the pore and can be modeled using the 1D Poisson-Nernst-Planck equation. Following the procedure of Misakian and Kasianowicz (27), we have calculated the asymmetry for  $\alpha$ HL using the coordinates of the amino acids in the  $\beta$ -barrel from the Protein Data Bank file. For AL, we used the  $\beta$ -barrel sequence of amino acids defined by Iacovache et al. (24,34) by sequence matching with toxin sequences of the same family. The positions of the charged amino acids along the pore are indicated in Table S1 and the potential is represented in Fig. S1. The calculated asymmetry versus temperature is displayed in the inset of Fig. 2 along with experimental results. Using this model, we obtain a good match between experiments and calculation for both pores; the mean diameter of the channel used to get the best match is 1.6 nm for  $\alpha$ HL and 1.4 nm for AL. The sequence identified by Iacovache et al. (24) nicely characterizes the current measured.

It is usually considered that the pore-current asymmetry is a combination of pore geometry and surface charge density (see, for instance, Siwy et al. (35) on conical solid-state pores). The important part is really an asymmetry of the electrical potential felt by the ions flowing through the pore (due to the geometry or the asymmetric surface charge density). It is worth noticing that the  $\alpha$ HL barrel is bearing five rings of charges (one positive and one negative at the *cis* entrance and two negative and one positive at the *trans* side of the pore), with a globally negative charge. The AL pore barrel is bearing seven rings of charges (four positive and three negative), with a positive global charge. Even though the pore is considered cylindrical, the differing distribution of the charges is enough to explain the differences in I-V curve between  $\alpha$ HL and AL pores.

## DNA transport dynamics

The DNA used to perform the translocation measurements are added to the solution of the *cis* chamber after stabilization of the desired temperature,  $T$ . We measure the translocation time and the event frequency either at constant  $T$  and as a function of the voltage applied,  $V$ , or at constant  $V$  and as a function of  $T$ . Typical traces of translocation events for  $\alpha$ HL and AL are given in Fig. 3 (top).

First, for the AL pore, we observe at low voltage (70 mV) that the duration of the events is short ( $\sim 10 \mu\text{s}$ ) and it increases with the voltage applied (see Fig. S2). We therefore conclude that these events do not represent molecules translocating through the pore. Starting at 100 mV, we observe much slower events ( $\sim 10 \text{ ms}$ ) with a lower blocked current. Their duration decreases with the voltage applied. We thus consider these slower events as translocation through the pore of aerolysin. The event frequency was calculated from these last events only. We therefore chose to perform the measurement at various temperatures at  $V = 100 \text{ mV}$ .

The mean current during DNA translocation divided by the open-pore current defines the normalized blocked current. For  $\alpha$ HL, the normalized-blocked-current histogram always shows two distinctive peaks. These two peaks were previously reported (36) as the blockade obtained by translocation of the DNA by its 3' end or by its 5' end. As a function of the voltage (Fig. 3, bottom left), the normalized current peak increases slightly between 100 mV and 160 mV

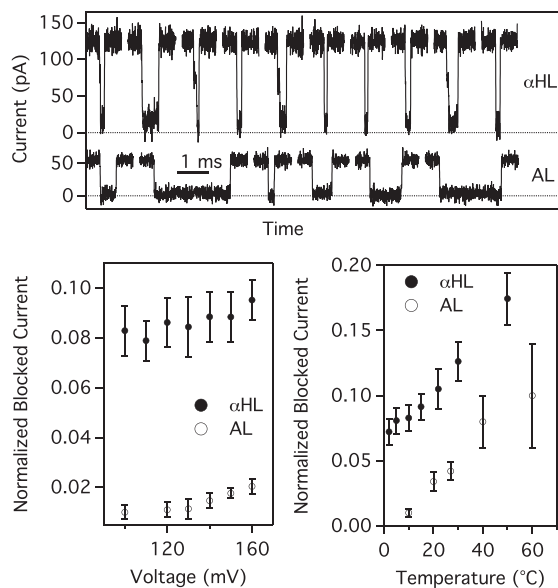

FIGURE 3 (Top) Examples of DNA translocation events observed in  $\alpha$ HL and in AL at  $T = 20^\circ\text{C}$  and  $V = 120 \text{ mV}$ . The timescale is represented by a 1 ms bar. (Bottom) Variation of the normalized blocked current as a function of voltage applied at  $10^\circ\text{C}$  (left) and variation of the normalized blocked current as a function of temperature at a voltage of 120 mV (right) ( $\alpha$ HL, solid circles; AL, open circles). The normalized blocked current increases slowly and uniformly with voltage and with temperature. The error bars represent the width of the normalized-blocked-current distribution.

from 0.079 to 0.095. This peak corresponds to the major one, meaning the 3' peak. The behavior of the 5' peak is very similar but shifted up to a mean normalized blocked current of 0.11 (not shown). The relative amplitudes of the two peaks do not significantly change with voltage. For AL pores, only one main peak is observed centered around a normalized blocked current of 0.010 (at 120 mV) up to 0.020 (at 160 mV). We could distinguish rare events with a normalized current of 0.04 at the highest voltages. As the AL pore is narrower than the  $\alpha$ HL pore, it is normal to observe a lower blockade current in similar conditions. As a function of temperature, we observe as well an increase of the blocked current, which is similar for both pores. If we consider an Arrhenius behavior for the blocked current, as was found for the open-pore current, we obtain energy barriers of  $\sim 5k_B T$  and  $12k_B T$  for the  $\alpha$ HL and AL pores, respectively. The large difference between the two pores may be due to the energy needed to confine the ion in the remaining space between the pore and the DNA. Considering the energy barrier calculation in Bonthuis et al. (10) and a diameter of 1.6 nm and 1.4 nm for  $\alpha$ HL and AL, the ratio of the energy barrier should be 2.2, close to what we obtain experimentally. Nevertheless, the current measurements are extremely sensitive to the filtering of the signal, especially at short event duration (31). This explains the increasing error bar at high temperatures, where the AL pores are not as stable as at lower temperatures, and it was necessary to filter the signal to 30 kHz.

We represent in Figs. 4 and 5 our measurements under the conditions previously stated for the frequency of entry into the pore and the translocation time, respectively. As a reference, we show in Figs S3 and S4 the frequency of events and translocation times at constant  $T = 10^\circ\text{C}$  as a function of voltage. These results are very similar to what can be found

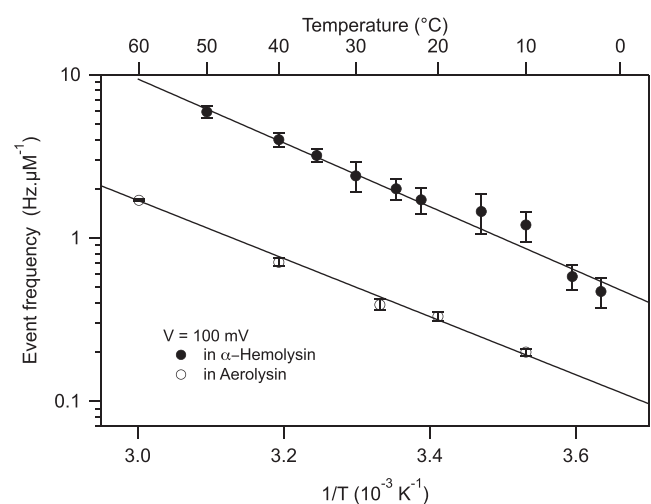

FIGURE 4 Event frequency per unit of concentration versus temperature for  $\alpha$ HL (solid circles) and AL pores (open circles) measured at a voltage of 100 mV. The plain curves are fits to Arrhenius law, leading to an enthalpic barrier of  $15k_B T$  for both pores.

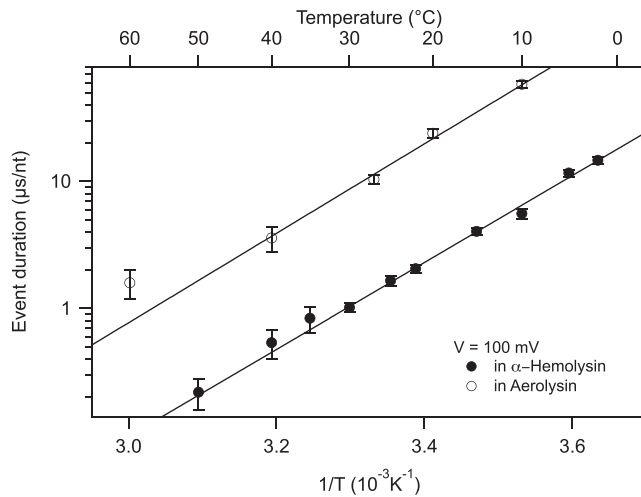

FIGURE 5 Translocation time per nucleotide versus temperature for  $\alpha$ HL (solid circles) and AL pores (open circles) measured at a voltage of 100 mV. The plain curves are fits to the model presented in the text. They could equally be fitted to Arrhenius law, leading to an enthalpic barrier of  $35k_B T$  for both pores. At high temperature, the value of the translocation time in AL deviates significantly from the fit. This is due to the fact that at this short timescale, our detection system reaches its limits. This effect has already been reported for protein transport through  $\alpha$ HL and AL (9). Here, the  $\alpha$ HL data set is not affected by this because of its much higher signal/noise ratio.

in the literature (8,14), although we could not find extensive study of DNA transport through AL pores.

The translocation of a polymer through a protein pore involves two steps of first nucleating across a free-energy barrier of entry into the pore and subsequently moving down a free-energy landscape along the pore by a combination of diffusion and drift processes. The free-energy landscape for a particular combination of polymer and pore is nonuniversal and depends sensitively on the polymer sequence, the distribution of hydrophobic and charged amino acid residues inside the pore, and the magnitude of the electrochemical potential gradient driving the translocation. During translocation, the monomers are subjected to highly heterogeneous patterns of charges, dipoles, and hydrophobic patches. A precise computation of the free-energy landscape for transporting  $dA_{29}dC_7dA_{14}$  through  $\alpha$ HL and AL pores is impossible due to the lack of adequate knowledge of electrohydrodynamic forces inside the protein pore environment. Nevertheless, it is widely recognized that electrostatic interactions play an important role in the translocation process of DNA through  $\alpha$ HL, as noted in Rincon-Restrepo et al. (12). Those authors observed that the translocation time is exponentially dependent on the number of positively charged amino acids in the barrel of the channel. From their measurements, and considering the number of charges present in the barrels of  $\alpha$ HL (14 total) and AL (28 total), the translocation times should display an  $\sim 10$ -fold difference, as is observed in our experiments. It was also proposed in theoretical and numerical work that attractive interaction

between polymer and pore plays an important role in the transport dynamics (37–39). In that respect, we model the DNA-pore interactions by an electrostatic contribution globally located all along the pore. Given the complexity of chemical details on the pore surface, and the necessity to account for the pore-polymer interaction, we coarse-grain the chemical details and assume that there is a uniform interaction energy per monomer,  $\epsilon_0$ , all along the pore (30).

The generic nature of the free-energy landscape can be seen in Fig. 6. For the sake of clarity of the basic conceptual issues, we consider a uniform pore of length  $Ma$  and a uniformly charged polymer of length  $Na$ , where  $a$  is the monomer length and  $M < N$ . Under an applied voltage,  $\Delta V$ , the monomers in the polymer chain translocate through the pore in single file.

The essential features of the free-energy profile for translocation are 1) drift diffusion followed by an entropic barrier associated with placement of one chain end at the pore entrance; 2) an entropic barrier of squeezing enough monomers into the pore to ensure successful nucleation; 3) a free-energy gain (attractive pore,  $\epsilon_0 > 0$ ) or loss (repulsive pore,  $\epsilon_0 < 0$ ) associated with filling the pore in addition to the electrostatic energy gain for packing monomers into the pore; 4) a free-energy gain associated with the transfer of  $N - M$  monomers from *cis* to *trans* while the pore is filled with  $M$  monomers; and 5) a free-energy barrier for removing  $M$  monomers trapped inside the attractive pore into *trans*. These five steps are depicted in Fig. 6. The translocation coordinate,  $m$ , denotes the number of monomers depleted from *cis* until  $m$  reaches  $N$ . For  $N < m < N + M$ , it corresponds to a state where the pore is partially filled, with the rest of the chain being in the *trans*.

In general, the frequency of events is the nucleation rate across the initial barrier (associated with steps 1 and 2) and the translocation time (associated with steps 3 to 5). Clearly, the effective barriers for the event frequency and translocation time can be uncorrelated. Writing the nucleation barrier,  $\Delta F^*$ , as  $-T\Delta S^* + \Delta U^*$ , for steps 1 and 2 of Fig. 6, the event frequency,  $R_c$ , is

$$R_c \sim \exp \left[ \Delta S^* - \frac{\Delta U^*}{T} \right], \quad (1)$$

where  $\Delta S^* (< 0)$  is the entropic contribution to the barrier.

Experimentally, the event frequency at constant  $T = 10^\circ\text{C}$  follows the two regimes in  $\alpha$ HL already reported (8) (see Fig. S3). At low voltage, the frequency is reaction-limited by an energy barrier of entry, and at high voltage, the frequency is diffusion-limited. Comparing the data obtained at  $10^\circ\text{C}$ , the frequency of entry is six to eight times smaller in AL than in  $\alpha$ HL. Using the barrier-crossing formalism introduced in Henrickson et al. (14) (reviewed in the Supporting Material), we deduce an energy barrier of entry of  $10k_B T$  for both pores. This value is of the same order as entry barriers in the literature:  $8k_B T$  for DNA (14) and for

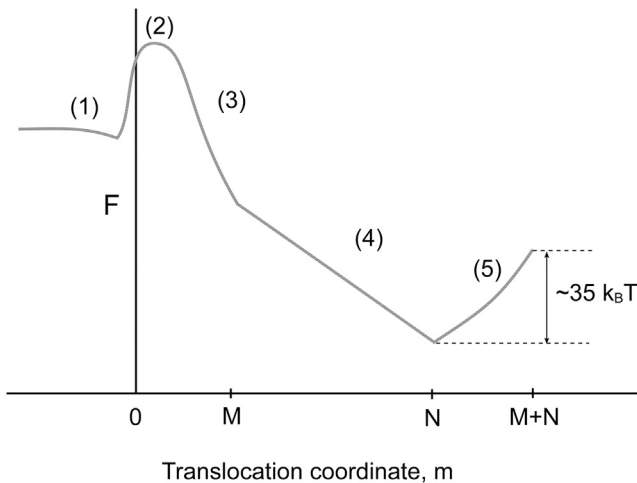

FIGURE 6 Sketch of the free-energy landscape for single-file translocation of a chain of  $N$  monomers through a pore of  $M$  monomer lengths. The translocation coordinate,  $m$ , denotes the number of monomers depleted from *cis* until it reaches the value  $N$  (with either  $m$  monomers inside the pore and  $N - m$  monomers in *cis* or with  $M$  monomers inside the pore,  $N - m$  monomers in *cis* and  $m - M$  monomers in *trans*). For  $m > N$ , the pore is partially filled, with the rest of the chain solely in *trans*. The key steps in the free-energy landscape are 1) placement of one chain end at the pore entrance; 2) entropic barrier crossing to nucleate a successful translocation by squeezing a large enough number of monomers into the pore; 3) a gain in electrostatic energy and pore-polymer interaction energy as more monomers enter an attractive pore under a favorable voltage gradient; 4) transfer of monomers from *cis* to *trans* with the pore remaining fully filled; and 5) an uphill process of polymer depletion from the pore. Steps 1 and 2 constitute the nucleation barrier controlling the translocation frequency. Steps 3–5 contribute to the translocation time. The barrier for the translocation time is attributed to the depletion of  $M$  monomers from the pore. Using  $\epsilon = 2.5k_B T$ ,  $M = 15$ , and  $N = 50$ , the effective free-energy barrier for extraction of the last  $M$  monomers is  $\sim 35k_B T$ .

proteins (15) or  $10k_B T$  for dextran sulfate (5). At constant voltage, the frequency displays an Arrhenius behavior as a function of temperature, yielding an enthalpic barrier contribution of  $\Delta U^* \simeq 15k_B T$ . The difference between the two estimates of this barrier comes from physical parameters like the solvent viscosity that are influenced by temperature but not by voltage. The six- to eightfold difference in event frequency between the two pores underlines an entropic contribution that is twice as large in AL as in  $\alpha$ HL, certainly due to the vestibule shape of  $\alpha$ HL acting as a funnel and favoring entry. It is also due to the AL constriction being smaller than that for  $\alpha$ HL.

Regarding the event duration, at constant  $T$ , we observe a decrease of the translocation time with an increase in applied voltage (see Fig. S4), and the time measured in AL is  $\sim 10$ -fold larger than in  $\alpha$ HL. Again, the AL constriction is smaller than that for  $\alpha$ HL. The constriction size deduced from the current and asymmetry measurements yields a difference in pore size of only  $\sim 10\%$ . Thus, this huge difference in event duration has to be due to interactions between the pore and the DNA molecule.

The free-energy profile felt by the DNA along the translocation process (steps 3 to 5 of Fig. 6) is written as follows, as originally described in Muthukumar (30). In step 3,  $m$  monomers are inside the pore without completely filling the pore ( $m < M$ ) and the rest of the monomers ( $N - m$ ) are in *cis*. The free energy of this state has three contributions. a) There is attractive energy between the  $m$  monomers and the pore,  $-\epsilon_0 m$ . b) There is an electrostatic energy gain. At a distance  $m'a$  from the pore entrance, the potential energy of a monomer is  $-qem'\Delta V/M$ , where  $q$  is the effective charge of the monomer,  $e$  the electronic charge, and  $\Delta V/M$  the electric field across the pore (assuming that the voltage drops linearly across the pore of length  $Ma$ ). Therefore, when  $m$  segments are inside the pore, the electrostatic energy gain for all of these monomers is the integral of this expression over  $m'$ , which gives  $-qe\Delta Vm^2/(2M)$ . c) There is a conformational entropic penalty from  $N - m$  monomers in *cis*. This contribution to free energy is  $k_B T(1 - \gamma')\ln(N - m)$ , where  $\gamma'$  is  $\sim 0.69$  for the conditions of typical nanopore experiments and  $k_B$  is the Boltzmann constant. As it turns out that the logarithmic term is negligible in comparison with the other two contributions, this part may safely be neglected. Therefore the free energy of the state with  $m$  monomers inside the pore but not filling it is given by

$$\frac{F(m)}{k_B T} = -\epsilon m - \frac{v}{2M}m^2, \quad 0 \leq m \leq M, \quad (2)$$

where  $\epsilon = \epsilon_0/k_B T$  and  $v = qe\Delta V/k_B T$ . It is to be noted that the timescale for equilibration of the polymer tail with  $N - m$  monomers in *cis* is a moot issue in the model presented here, since  $(1 - \gamma')\ln(N - m)$  is negligible in comparison with the two terms on the righthand side of the above equation.

It is straightforward to extend the above argument for steps 4 and 5, as given by Muthukumar (30), and obtain

$$\frac{F(m)}{k_B T} = -\epsilon M - v(m - M) - \frac{v}{2}M \quad M \leq m \leq N \quad (3)$$

and

$$\frac{F(m)}{k_B T} = -\epsilon(N + M - m) - v(m - M) - \frac{v}{2M} (M^2 - (m - N)^2) \quad N \leq m \leq N + M. \quad (4)$$

The translocation time corresponds to the time taken by a chain to pass through the pore from the entry point ( $m = 0$ ) to the exit point ( $m = N + M$ ). As also recognized in the literature, this is a stochastic variable and this quantity can be determined only in some statistical sense. The theoretical machinery most suited to connecting the free-energy landscape and the time evolution of the probability of realizing a particular state  $W_m(t)$  is the Fokker-Planck formalism

(40). In general, the Fokker-Planck equation for the situation presented here is

$$\frac{\partial W_m(t)}{\partial t} = D \frac{\partial}{\partial m} \left[ \frac{\partial(F(m)/k_B T)}{\partial m} W_m(t) + \frac{\partial W_m(t)}{\partial m} \right], \quad (5)$$

where  $D$  is the monomer diffusion coefficient inside the pore (30,40,41). Substitution of Eqs. 2–4 into Eq. 5 gives the time dependence of the probability of realizing a particular value of  $m$  in the translocation coordinate. The translocation time corresponds to the state of  $m = N + M$ . Using standard procedures in the Fokker-Planck formalism, the average translocation time,  $\tau$ , is given by

$$\tau = \frac{1}{D} \int_0^{N+M} dm \int_0^m dm' \exp \left[ \frac{F(m)}{T} - \frac{F(m')}{T} \right], \quad (6)$$

where  $F(m)$  is given by Eqs. 2–4. In defining  $\tau$ , we used the reflecting boundary condition at  $m = 0$  and the absorbing boundary condition at  $m = N + M$ .

For the  $dA_{29}dC_7dA_{14}$  ssDNA, we took the average monomer length,  $a$ , as 0.34 nm and  $N$  as 50. Taking the length of the  $\beta$ -barrel of the protein pore as 5 nm,  $M = 15$ . For  $\epsilon = 2.5k_B T$ ,  $q = 0.3$  (as suggested by the Manning condensation), and  $\Delta V = 100$  mV, the calculated  $\tau$  is given in Fig. 5 along with the experimental data for  $\alpha$ HL and AL pores. In making the comparison, the arbitrary shift factor  $1/D$  is chosen as  $1.88 \times 10^{-4}$ . The effective barrier is  $35k_B T$  and arises from the last step (step 5) of depletion of the polymer from the pore. Although the pore-monomer interaction is rather weak ( $\sim 2.5k_B T$ ), the barrier for translocation is amplified by the depletion stage. We observe a similar enthalpic contribution in  $\alpha$ HL and AL pores. The main difference between the translocation times in the two pores arises from the entropic contribution, even though the pore barrels do not bear the same charges.

Because the main feature of the free-energy landscape of Fig. 6 is the energy of extraction of the  $M$  last monomers out of the pore, the temperature dependence is similar to a single barrier process. This is indeed what is observed experimentally despite the apparent complexity of the free-energy landscape. Although the theoretical model uses an interaction energy between a DNA segment and the pore, the precise nature of the molecular origin of the barrier remains to be explored.

## CONCLUSIONS

In conclusion, we have used the electrostatic interactions created by the pore-wall charges with either the ions or the translocating DNA chain to model the ionic I-V curve and the DNA transport dynamics, respectively, in  $\alpha$ HL and AL nanopores. The ionic current rectification versus temperature arises from the local energy landscape felt by the ions when going through the pore. Furthermore, our rectification analysis validates the sequence presumed in

the literature to be responsible for the barrel formation of AL pores. This barrel bears twice as many positively charged residues as the  $\alpha$ HL pore, which can thus greatly influence the polyelectrolyte transport.

About the dynamics of transport of DNA through the pores, the existing paradigm is that there is one energy barrier in the translocation process for entry into the pore followed by a downhill fall along the electric potential. From the Arrhenius plots of the translocation time in both pores, we observe that there is as well an energy barrier to exit the pore. This could only be demonstrated by studying the temperature influence on the transport dynamics. Previous articles on DNA transport have focused on the voltage dependence of the translocation time leading to an effective charge, a sort of lever arm to decrease the barrier height. Surprisingly, the entry barrier ( $15k_B T$ ) is much smaller than the barrier of translocation ( $35k_B T$ ), despite a much stronger driving electric field in the pore compared to the outside.

The model we present reveals the mechanism of the process. We model the electrostatic interaction felt by the DNA in the pore by a mean interaction potential per monomer, and the experimental results are fitted by this model. The global energy barrier of  $\sim 35k_B T$  for both pores leads to a  $2.5k_B T$  interaction energy per monomer inside the pore channel.

The experimental data along with the theoretical model reveal the importance of the interaction between DNA and the charge decoration inside the pore, which dominates the DNA translocation kinetics. This has profound implications for controlling the speed of DNA transport. The full energy landscape, including electrostatics and hydrophobicity, is very complex, and a later study will take into account local features of the energy landscape, allowing a more precise description of the process and a better understanding of the tunable parameters to control the translocation kinetics.

## SUPPORTING MATERIAL

Supporting Materials and Methods, six figures, and one table are available at [http://www.biophysj.org/biophysj/supplemental/S0006-3495\(15\)00926-1](http://www.biophysj.org/biophysj/supplemental/S0006-3495(15)00926-1).

## AUTHOR CONTRIBUTIONS

L.P. and M.M. did the DNA translocation experiments in AL and  $\alpha$ HL pores. C.M. did open-pore measurements of aerolysin pores. M.P.G. and J.P. produced the AL protein monomers. V.V. and L.A. were involved in data analysis and in the discussion of this article. M.M. developed the theoretical model and wrote the article. J.M. designed the experiment, did the IV curve calculations and the data analysis, and wrote the article.

## ACKNOWLEDGMENTS

We thank F. Gisous Van Der Goot for the vector recombinant aerolysin. At the time of the data acquisition, L.P. and M.M. were postdoctoral fellows of Genopole. This work was supported by grant funding from the Agence

Nationale de la Recherche, Blanche project TRANSFOLDPROT (ANR-BLAN08-1\_339991), the National Institutes of Health (grant R01HG002776-11), and the Air Force Office of Scientific Research (grant FA9550-14-1-0164).

## REFERENCES

- Akeson, M., D. Branton, ..., D. W. Deamer. 1999. Microsecond time-scale discrimination among polycytidylic acid, polyadenylic acid, and polyuridylic acid as homopolymers or as segments within single RNA molecules. *Biophys. J.* 77:3227–3233.
- Meller, A., L. Nivon, ..., D. Branton. 2000. Rapid nanopore discrimination between single polynucleotide molecules. *Proc. Natl. Acad. Sci. USA.* 97:1079–1084.
- Muthukumar, M. 2002. Theory of sequence effects on DNA translocation through proteins and nanopores. *Electrophoresis.* 23:1417–1420.
- Oukhaled, A. G., A.-L. Biance, ..., L. Bacri. 2012. Transport of long neutral polymers in the semidilute regime through a protein nanopore. *Phys. Rev. Lett.* 108:088104.
- Brun, L., M. Pastoriza-Gallego, ..., J. Pelta. 2008. Dynamics of polyelectrolyte transport through a protein channel as a function of applied voltage. *Phys. Rev. Lett.* 100:158302.
- Pastoriza-Gallego, M., L. Rabah, ..., J. Pelta. 2011. Dynamics of unfolded protein transport through an aerolysin pore. *J. Am. Chem. Soc.* 133:2923–2931.
- Meller, A., L. Nivon, and D. Branton. 2001. Voltage-driven DNA translocations through a nanopore. *Phys. Rev. Lett.* 86:3435–3438.
- Meller, A., and D. Branton. 2002. Single molecule measurements of DNA transport through a nanopore. *Electrophoresis.* 23:2583–2591.
- Payet, L., M. Martinho, ..., J. Mathé. 2012. Thermal unfolding of proteins probed at the single molecule level using nanopores. *Anal. Chem.* 84:4071–4076.
- Bonthuis, D. J., J. Zhang, ..., A. Meller. 2006. Self-energy-limited ion transport in subnanometer channels. *Phys. Rev. Lett.* 97:128104.
- Oukhaled, A. G., L. Bacri, ..., L. Auvray. 2008. Effect of screening on the transport of polyelectrolytes through nanopores. *Europhys. Lett.* 82:48003.
- Rincon-Restrepo, M., E. Mikhailova, ..., G. Maglia. 2011. Controlled translocation of individual DNA molecules through protein nanopores with engineered molecular brakes. *Nano Lett.* 11:746–750.
- Pastoriza-Gallego, M., G. Gibrat, ..., J. Pelta. 2009. Polyelectrolyte and unfolded protein pore entrance depends on the pore geometry. *Biochim. Biophys. Acta.* 1788:1377–1386.
- Henrickson, S. E., M. Misakian, ..., J. J. Kasianowicz. 2000. Driven DNA transport into an asymmetric nanometer-scale pore. *Phys. Rev. Lett.* 85:3057–3060.
- Oukhaled, G., J. Mathé, ..., L. Auvray. 2007. Unfolding of proteins and long transient conformations detected by single nanopore recording. *Phys. Rev. Lett.* 98:158101.
- Kowalczyk, S. W., D. B. Wells, ..., C. Dekker. 2012. Slowing down DNA translocation through a nanopore in lithium chloride. *Nano Lett.* 12:1038–1044.
- Christensen, C., C. Baran, ..., J. S. Lee. 2011. Effect of charge, topology and orientation of the electric field on the interaction of peptides with the  $\alpha$ -hemolysin pore. *J. Pept. Sci.* 17:726–734.
- Matysiak, S., A. Montesi, ..., C. Clementi. 2006. Dynamics of polymer translocation through nanopores: theory meets experiment. *Phys. Rev. Lett.* 96:118103.
- Mahendran, K. R., U. Lamichhane, ..., M. Winterhalter. 2013. Polypeptide translocation through mitochondrial TOM channel: temperature dependent rates at single molecule level. *J. Phys. Chem. Lett.* 4:78–82.
- Maglia, G., M. R. Restrepo, ..., H. Bayley. 2008. Enhanced translocation of single DNA molecules through  $\alpha$ -hemolysin nanopores by manipulation of internal charge. *Proc. Natl. Acad. Sci. USA.* 105:19720–19725.
- Buchsbaum, S. F., N. Mitchell, ..., S. Howorka. 2013. Disentangling steric and electrostatic factors in nanoscale transport through confined space. *Nano Lett.* 13:3890–3896.
- Muthukumar, M., and H. H. Katkar. 2015. Reading nanopore clocks in single-molecule electrophoresis experiments. *Biophys. J.* 108:17–19.
- Song, L., M. R. Hobaugh, ..., J. E. Gouaux. 1996. Structure of staphylococcal  $\alpha$ -hemolysin, a heptameric transmembrane pore. *Science.* 274:1859–1866.
- Iacovache, I., P. Paumard, ..., F. G. van der Goot. 2006. A rivet model for channel formation by aerolysin-like pore-forming toxins. *EMBO J.* 25:457–466.
- Noskov, S. Y., W. Im, and B. Roux. 2004. Ion permeation through the  $\alpha$ -hemolysin channel: theoretical studies based on Brownian dynamics and Poisson-Nernst-Planck electrodiffusion theory. *Biophys. J.* 87:2299–2309.
- Aksimentiev, A., and K. Schulten. 2005. Imaging  $\alpha$ -hemolysin with molecular dynamics: ionic conductance, osmotic permeability, and the electrostatic potential map. *Biophys. J.* 88:3745–3761.
- Misakian, M., and J. J. Kasianowicz. 2003. Electrostatic influence on ion transport through the  $\alpha$ HL channel. *J. Membr. Biol.* 195:137–146.
- Bhattacharya, S., L. Muzard, ..., V. Viasnoff. 2011. Rectification of the current in  $\alpha$ -hemolysin pore depends on the cation type: the alkali series probed by molecular dynamics simulations and experiments. *J. Phys. Chem. C Nanomater. Interfaces.* 115:4255–4264.
- Parker, M. W., J. T. Buckley, ..., D. Tsernoglou. 1994. Structure of the *Aeromonas* toxin proaerolysin in its water-soluble and membrane-channel states. *Nature.* 367:292–295.
- Muthukumar, M. 2003. Polymer escape through a nanopore. *J. Chem. Phys.* 118:5174–5184.
- Merstorf, C., B. Cressiot, ..., J. Mathé. 2012. DNA unzipping and protein unfolding using nanopores. *Methods Mol. Biol.* 870:55–75.
- Kang, X.-F., L.-Q. Gu, ..., H. Bayley. 2005. Single protein pores containing molecular adapters at high temperatures. *Angew. Chem. Int. Ed. Engl.* 44:1495–1499.
- Wu, Y., W. Koch, ..., A. Tomek. 1994. A dc method for the absolute determination of conductivities of the primary standard KCl solutions from 0°C to 50°C. *J. Res. Natl. Inst. Stand. Technol.* 99:241–246.
- Degiacomi, M. T., I. Iacovache, ..., M. Dal Peraro. 2013. Molecular assembly of the aerolysin pore reveals a swirling membrane-insertion mechanism. *Nat. Chem. Biol.* 9:623–629.
- Siwy, Z., Y. Gu, ..., Y. Korchev. 2002. Rectification and voltage gating of ion currents in a nanofabricated pore. *Europhys. Lett.* 60:349–355.
- Mathé, J., A. Aksimentiev, ..., A. Meller. 2005. Orientation discrimination of single-stranded DNA inside the  $\alpha$ -hemolysin membrane channel. *Proc. Natl. Acad. Sci. USA.* 102:12377–12382.
- Luo, K., T. Ala-Nissila, ..., A. Bhattacharya. 2007. Influence of polymer-pore interactions on translocation. *Phys. Rev. Lett.* 99:148102.
- Luo, K., T. Ala-Nissila, ..., A. Bhattacharya. 2008. Translocation dynamics with attractive nanopore-polymer interactions. *Phys. Rev. E Stat. Nonlin. Soft Matter Phys.* 78:061918.
- Anderson, B. N., M. Muthukumar, and A. Meller. 2013. pH tuning of DNA translocation time through organically functionalized nanopores. *ACS Nano.* 7:1408–1414.
- Muthukumar, M. 2011. Polymer Translocation. CRC Press, Boca Raton, FL.
- Muthukumar, M. 2014. Communication: charge, diffusion, and mobility of proteins through nanopores. *J. Chem. Phys.* 141:081104.



# Supplementary Material for : Temperature effect on ionic current and ssDNA transport through nanopores

L. Payet, M. Martinho, C. Merstorf, M. Pastoriza-Gallego, J. Pelta, V. Viasnoff, L. Auvray, M. Muthukumar and J. Mathé

## Material and Methods

The toxin Aerolysin was synthesized using the following procedure. We have transformed E. coli BL21 strain with the plasmid containing proaerolysin sequence. This plasmid is endowed with different elements for production and purification of the protein: inducible expression with IPTG system, signal for periplasmic localization, histidine tag in C-terminal region of the protein. The recombinant proaerolysin protein is purified by an affinity chromatography of histidine-tagged proteins (His Spin Trap, Amersham). The purity of the preparation is determined by densitometry analysis of Coomassie blue SDS-polyacrylamide gel electrophoresis, to  $99 \pm 1\%$  (w/w). The propeptid of pro-AL monomers are stored at a final concentration of 0.4 g/l in water. Upon use, the propeptid is first cut by some Trypsin at a final concentration of  $0.36 \mu\text{M}$  in water. The active AL monomers were then diluted in the buffer to a ratio of  $10 \mu\text{l}$  of this solution per milliliter of buffer in the *cis* chamber.

The current-Voltage curves of a single pore were measured by applying a triangle voltage between -150 mV and +150 mV and a rate of about 2.3 V/s for 25 cycles. The upward and downward ramps are then averaged to reduce the noise amplitude and discard the capacitive component of the current. The variability from pore to pore are estimated to  $\pm 7.5\%$  at  $25^\circ\text{C}$  (1). It becomes slightly larger as the temperature is raised. The IV-Curve obviously depends on the orientation of the pore with respect to the electrode polarization. We thus used the following strict insertion procedure. The membrane is formed on a Teflon aperture separating two chambers. The first one is grounded and thereafter called *cis* chamber. The potential (positive or negative) is applied to the second chamber thereafter called *trans* chamber. The toxin monomers are inserted in the *cis* chamber after the formation of the lipid bilayer. The bilayer is never reformed while waiting for a pore insertion. Therefore it is very likely to observe insertion

of the toxin with its extra-membrane part in the *cis* (grounded) chamber. Indeed, using all pores insertions observed for the present data set, 92% of the  $\alpha$ -HL insertions (173 over 187) and 90% (88 over 97) of the AL insertions had a I-V curve oriented as in Figure 1 of the article.

The translocation events are captured on the fly using the analog triggering of the acquisition board. The trigger threshold was set to 90% of the empty pore current at the voltage studied. From these events we extract the open pore current the blocked current the dwell time and the inter event time. The very short events are smoothed by the low pass filter altering the dwell time and the blocked pore (as explained in (2-4)). In order to perform the analysis of the events, a second current threshold is applied which discard the noisy spikes and allows a better definition of the time scales and blocked current. This threshold is defined from the all-point histogram of the current traces of all the event and is set at the end of the open pore current peak. We represent the result of an experiment for a certain set of parameters (pore, voltage and temperature) by a two dimensional histogram (like Figures S-2 and S-6) allowing to distinguish easily clusters of events of different kind as the 3' and 5' clouds previously reported (5, 6) for forward and backward threading of a ssDNA in  $\alpha$ -Hemolysin.

## IV Curves calculation

Following (7), we calculated the IV curves at different temperature and deduced the asymmetry. We first calculated the electrostatic potential seen by the ions at different applied voltage (see Figure S 1 for a voltage of -120 mV) and then the IV curve itself. Resolving the 1D Nerst-Planck equation numerically (1, 8). Table S-T 1 references the amino acid position and calculated electric potential at the center of the pore. These values are very close to the one used for  $\alpha$ -Hemolysin in Ref (7). The mean diameter of the channel used in the calculation was 1.6 nm for  $\alpha$ HL and 1.4 nm for AL.

| $\alpha$ -Hemolysin |          |      |                | Aerolysin  |          |      |                |
|---------------------|----------|------|----------------|------------|----------|------|----------------|
| Amino Acid          | Position | pK   | potential (mV) | Amino Acid | Position | pK   | potential (mV) |
| E111                | 0.05     | 4.5  | -18.8          | K238       | 0.06     | 10.5 | +17.1          |
| K147                | 0.13     | 10.5 | +13.5          | E258       | 0.37     | 4.5  | -23.9          |
| D127                | 0.77     | 3.9  | -18.1          | K242       | 0.46     | 10.5 | +17.1          |
| K131                | 0.83     | 10.5 | +13.5          | K244       | 0.69     | 10.5 | +17.1          |
| D128                | 0.91     | 3.9  | -18.1          | E258       | 0.78     | 4.5  | -23.9          |
|                     |          |      |                | K246       | 0.90     | 10.5 | +17.1          |
|                     |          |      |                | E252       | 0.95     | 4.5  | -23.9          |

Figure S-T 1: Amino acid positions and potential along the pore axis for  $\alpha$ -Hemolysin and Aerolysin. The potential was calculated for a cylindrical pore of diameter 16 and 14 Å for  $\alpha$ -Hemolysin and Aerolysin respectively. The position along the pore axis are given as fraction of the pore length. The pore length is 5 nm for both pore, the Debye length is 3 Å and the pH of the buffer is 7.5 .

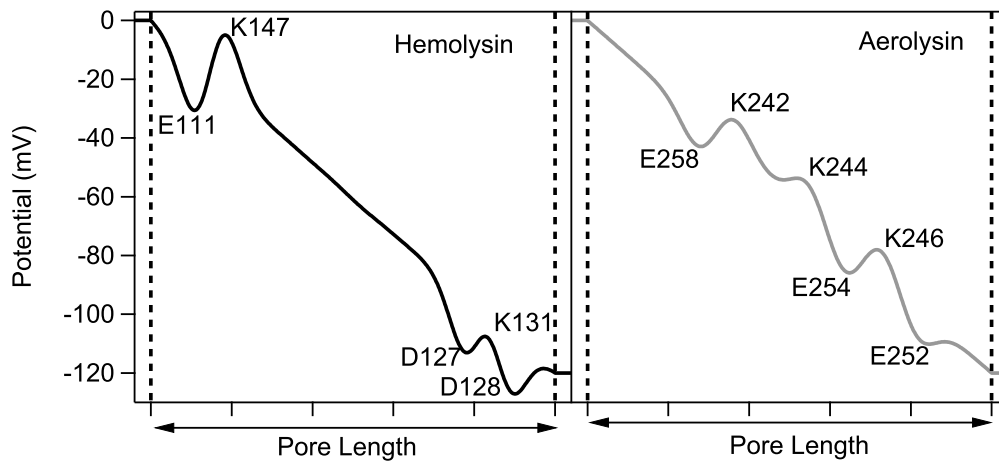

Figure S- 1: Electrostatic potential map along the pore axis due to the voltage applied (-120 mV here) and to the charge of the amino acids present in the pore channel. We discarded the extra membranar part of the toxins as the main features in the IV curves depends on the barrel charges (1, 9).

## ssDNA transport

We represent the measurements as a two dimensional probability density function  $P(I_b, T_t)$  of events in order to discriminate clusters of event of different kind. In Figure S-2, we display the  $P$  distribution at room temperature and for 4 voltages for Aerolysin pores. Two types of events are observed: Short time events ( $\sim 100 \mu\text{s}$ ) associated with DNA bumping the pore without full insertion and longer duration events ( $\sim 1 \text{ ms}$ ) associated to molecules inserted in the pore constriction. Indeed the shorter time increases with voltage indicating that the DNA molecules are blocked at the entrance of the pore. The unblocking would occur by diffusion out of the pore entrance region while the voltage forces the molecules to stay in the pore (10). At about 100 mV, the longer time events are observed and their duration decreases with the applied voltage indicating that the molecule goes fully in the pore. Using PCR DNA molecules with a different sequence were proved to pass through AL pore (11).

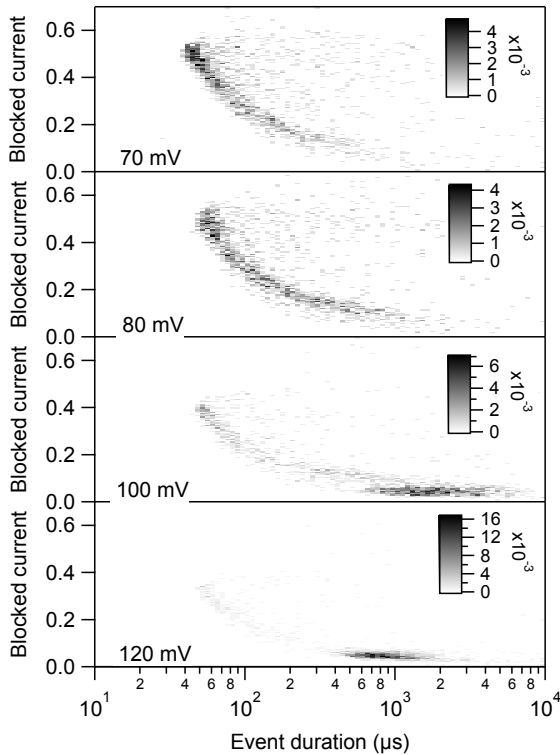

Figure S- 2: Two dimensional probability density function  $P(I_b, T_t)$  of events in Aerolysin at room temperature and at voltages of 70 mV 80 mV 100 mV and 120 mV. The increase of the normalized blocked current for the shorter time is due to the low pass filtering of the signal as described in (3, 4). The number of events in each histograms are 1916, 1883, 1889 and 1875 for 70, 80, 100 and 120 mV respectively.

The figure 3 shows the frequency of events per  $\mu\text{M}$  of molecules in  $\alpha\text{HL}$  and AL as a function of voltage at a constant temperature  $T=10^\circ\text{C}$ . As expected for both nanopores, the frequency increases with voltage.

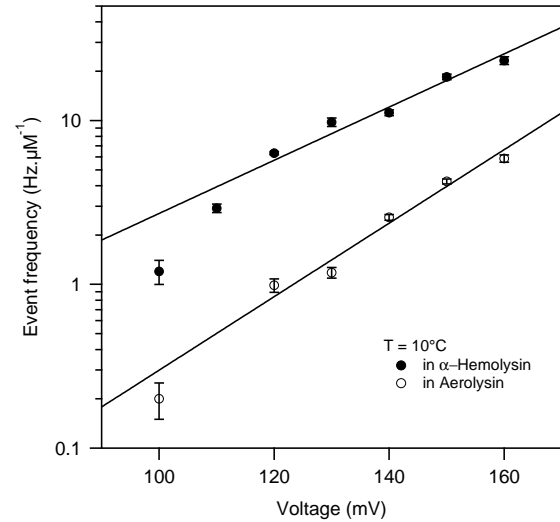

Figure S- 3: Event frequency measured at  $T=10^\circ\text{C}$  for different voltages using  $\alpha$ -Hemolysin (filled circles) and Aerolysin (empty circles). The plain curves are exponential fits leading to an effective charge of about  $1.5e$ . From the extrapolation at zero voltage and using barrier crossing formalism as in (12) we obtain a free energy barrier of about  $10 k_B T$ .

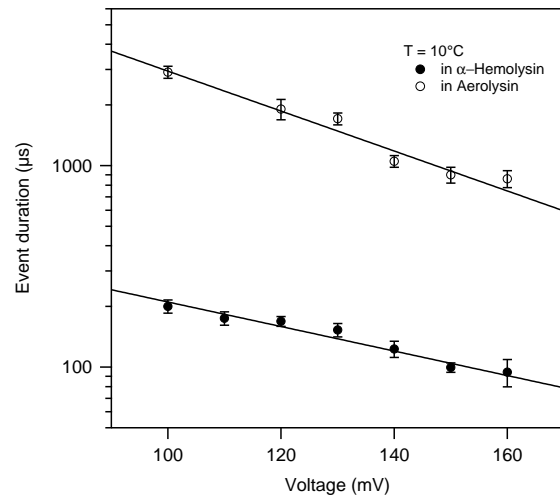

Figure S- 4: Event duration measured at  $T=10^\circ\text{C}$  for different voltages using  $\alpha$ -Hemolysin (filled circles) and Aerolysin (empty circles). Plain curves are exponential fits leading to effective charges of  $0.4e$  in  $\alpha$ -Hemolysin and  $0.6e$  in Aerolysin, very similar to the ones obtained for other polyelectrolytes in Ref. (13–15).

The reaction-rate theory predicts that the variation of the translocation rate with temperature and voltage follows this relation:

$$F_e(V, T) = f_0 e^{-\frac{\Delta F^*}{kT}} e^{\frac{q_f V}{k_B T}} \quad (1)$$

where  $\Delta F^*$  is the entrance energy barrier defined in the main text,  $V$  is the applied voltage,  $q_f$  is the effective charge of the molecule in bulk solution. These exponential dependences describe the translocation of the polymer in a complex energy landscape with an energy barrier probably of enthalpic and entropic origins which decreases with the applied voltage (16).

From the graphs, we can extract the different parameters defined in the above formalism. At constant temperature, the slope of the frequency *vs* voltage in a semi-Log plot yields to a characteristic voltage  $V_f = \frac{k_B T}{q_f}$  representing the voltage needed to give to the molecule a energy of  $k_B T$ . To evaluate  $\Delta F^*$ , we estimate  $f_0$  proportional to an upper bound for the ssDNA flux to the pore which gives  $f_0 \sim CDr$ , where  $D$  is the bulk diffusion coefficient of the oligomer (about  $10^{-7} \text{ cm}^2 \cdot \text{s}^{-1}$ ),  $C$  its concentration and  $r$  is the radius of the pore. This estimation yields to a barrier of about  $10k_B T$  in both pores.

The values of  $V_f$  we obtain for AL and HL at  $10^\circ \text{C}$  are very close to the previously reported ones (12, 17).

### Water evaporation

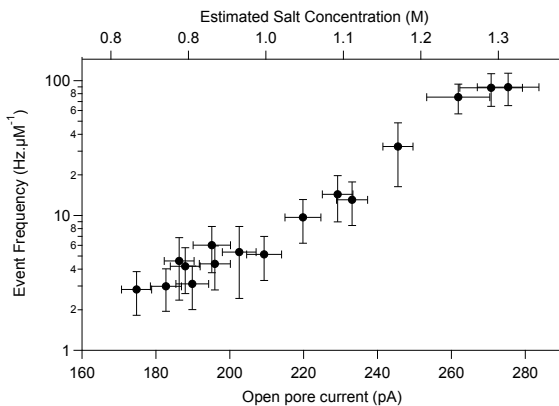

Figure S- 5: Event frequency of entry of ssDNA in  $\alpha$ HL pore at  $V = 120 \text{ mV}$  and  $T = 50^\circ \text{C}$ . We observe clearly an exponential increase of this frequency as a function of the salt concentration due to water evaporation. The influence of the increase of DNA concentration due to evaporation can be neglected.

We demonstrate on Figure S-5 the absolute necessity to control the water evaporation, in particular at high temperature. Figure S-5 represents the frequency measured with  $\alpha$ HL pores thermalized to  $T = 50^\circ \text{C}$  without control of the evaporation. As already observed in (18), the events frequency has an exponential dependence on salt concentration (at high concentration which is the case here). On the other hand, the water evaporation will increase the concentrations of DNA and salt. The influence of the DNA concentration increase being only linear, we therefore observed an exponential dependence

of the frequency with the salt concentration. The salt concentration (upper scale on Figure S-5) is deduce from the open pore current considering that the concentration is 1.0 M if the current is equal to the mean open pore current from the Figure 2 of the main paper at the correct temperature. In this case the mean open pore current is 209 pA at ( $50^\circ$ ).

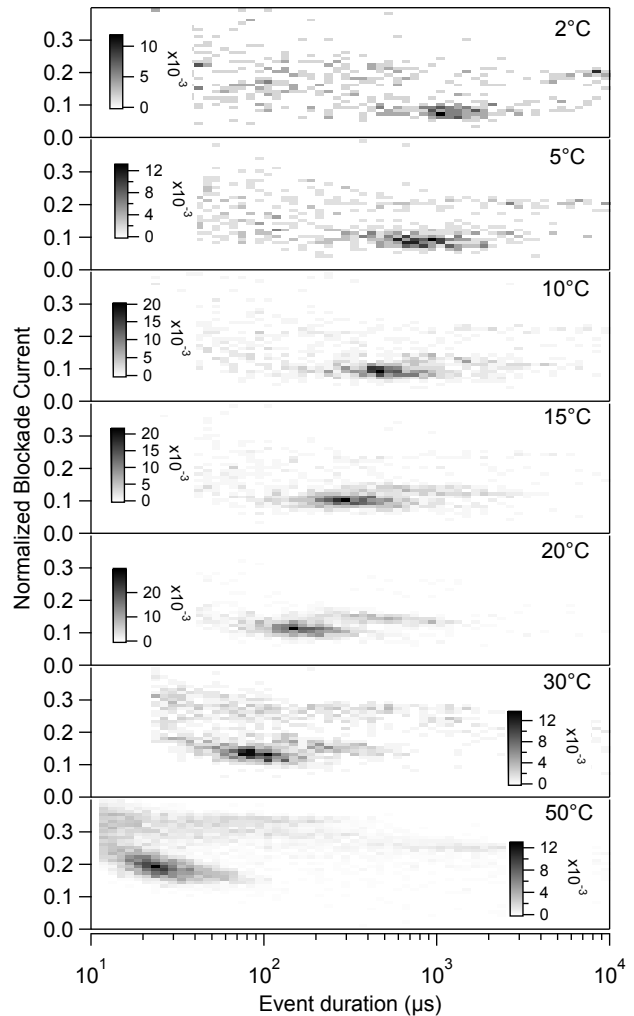

Figure S- 6: Two dimensional probability density functions  $P(I_b, T_t)$  of events in  $\alpha$ -Hemolysin at  $V = 100 \text{ mV}$  and at Temperature ranging from 2 to  $50^\circ \text{C}$ . Two main types of events are observed previously associated to 3'-end and 5'-end entrance in the pore. The two types of event have duration decreasing with temperature. At  $50^\circ \text{C}$  they cannot be distinguished. The increase of the normalized blocked current for the shorter time is due to the low pass filtering of the signal as described in (3, 4). The number of event in each histogram are 514, 618, 1059, 1267, 1359, 1628 and 6655 for 2, 5, 10, 15, 20, 30 and  $50^\circ \text{C}$  respectively.

## References

1. S Bhattacharya, L Muzard, Linda Payet, Jérôme Mathé, Ulrich Bockelmann, Aleksei Aksimentiev, and Virgile Viasnoff. Rectification of the current in alpha-hemolysin pore depends on the cation type: The alkali series probed by molecular dynamics simulations and experiments. *J Phys Chem C*, 115(10):4255–4264, 2011.
2. D Pedone, M Firnkes, and U Rant. Data analysis of translocation events in nanopore experiments. *Anal Chem*, 81(23):9689–94, Dec 2009.
3. C Merstorf, B Cressiot, M Pastoriza-Gallego, A G Oukhaled, L Bacri, J Gierak, J Pelta, L Auvray, and J Mathé. DNA unzipping and protein unfolding using nanopores. *Methods Mol Biol*, 870:55–75, Jan 2012.
4. L Payet, M Martinho, M Pastoriza-Gallego, J-M Betton, L Auvray, J Pelta, and J Mathé. Thermal unfolding of proteins probed at the single molecule level using nanopores. *Anal Chem*, 84(9):4071–6, May 2012.
5. J Mathé, A Aksimentiev, D R Nelson, K Schulten, and A Meller. Orientation discrimination of single-stranded dna inside the alpha-hemolysin membrane channel. *Proc Natl Acad Sci USA*, 102(35):12377–82, Aug 2005.
6. J Muzard, M Martinho, Jérôme Mathé, Ulrich Bockelmann, and Virgile Viasnoff. Dna translocation and unzipping through a nanopore: some geometrical effects. *Biophys J*, 98(10):2170–8, May 2010.
7. M Misakian and J J Kasianowicz. Electrostatic influence on ion transport through the alpha-hemolysin channel. *J Membr Biol*, 195(3):137–46, Oct 2003.
8. S Matysiak, A Montesi, M Pasquali, A B Kolomeisky, and C Clementi. Dynamics of polymer translocation through nanopores: theory meets experiment. *Phys Rev Lett*, 96(11):118103, Mar 2006.
9. S Yu Noskov, W Im, and B Roux. Ion permeation through the alpha-hemolysin channel: theoretical studies based on brownian dynamics and poisson-nernst-planck electrodiffusion theory. *Biophys J*, 87(4):2299–309, Oct 2004.
10. M Wiggan, C Tropini, V Tabard-Cossa, N N Jetha, and A Marziali. Nonexponential kinetics of dna escape from alpha-hemolysin nanopores. *Biophys J*, 95(11):5317–5323, Jan 2008.
11. M Pastoriza-Gallego, M-F Breton, F Discala, L Auvray, J-M Betton, and J Pelta. Evidence of Unfolded Protein Translocation through a Protein Nanopore. *ACS Nano*, 8(11):11350–11360, 2014.
12. S E Henrickson, Martin Misakian, B Robertson, and John J Kasianowicz. Driven dna transport into an asymmetric nanometer-scale pore. *Phys Rev Lett*, 85(14):3057–60, Oct 2000.
13. A G Oukhaled, J Mathé, A-L Biance, L Bacri, J-M Betton, D Lairez, J Pelta, and L Auvray. Unfolding of proteins and long transient conformations detected by single nanopore recording. *Phys Rev Lett*, 98(15):158101, Apr 2007.
14. L Brun, M Pastoriza-Gallego, A G Oukhaled, J Mathé, L Bacri, L Auvray, and J Pelta. Dynamics of polyelectrolyte transport through a protein channel as a function of applied voltage. *Phys Rev Lett*, 100(15):158302, Apr 2008.
15. M Pastoriza-Gallego, L Rabah, G Gibrat, B Thiebot, F Gisou van der Goot, L Auvray, J-M Betton, and J Pelta. Dynamics of unfolded protein transport through an aerolysin pore. *J Am Chem Soc*, 133(9):2923–2931, Mar 2011.
16. Y Lansac, P Maiti, and M Glaser. Coarse-grained simulation of polymer translocation through an artificial nanopore. *Polymer*, 45(9):3099–3110, 2004.
17. A Meller and D Branton. Single molecule measurements of dna transport through a nanopore. *Electrophoresis*, 23(16):2583–2591, 2002.
18. D J Bonthuis, J Zhang, B Hornblower, J Mathé, B I Shklovskii, and A Meller. Self-energy-limited ion transport in subnanometer channels. *Phys Rev Lett*, 97(12):128104, 2006.
